# Supplementary material
Source: MDPI journal article supplement (https://www.mdpi.com/search?q=molbank-2020-M1162)
Supplement: s001 [file molbank-2020-M1162-s001.pdf]

SUPPLEMENTARY MATERIALS

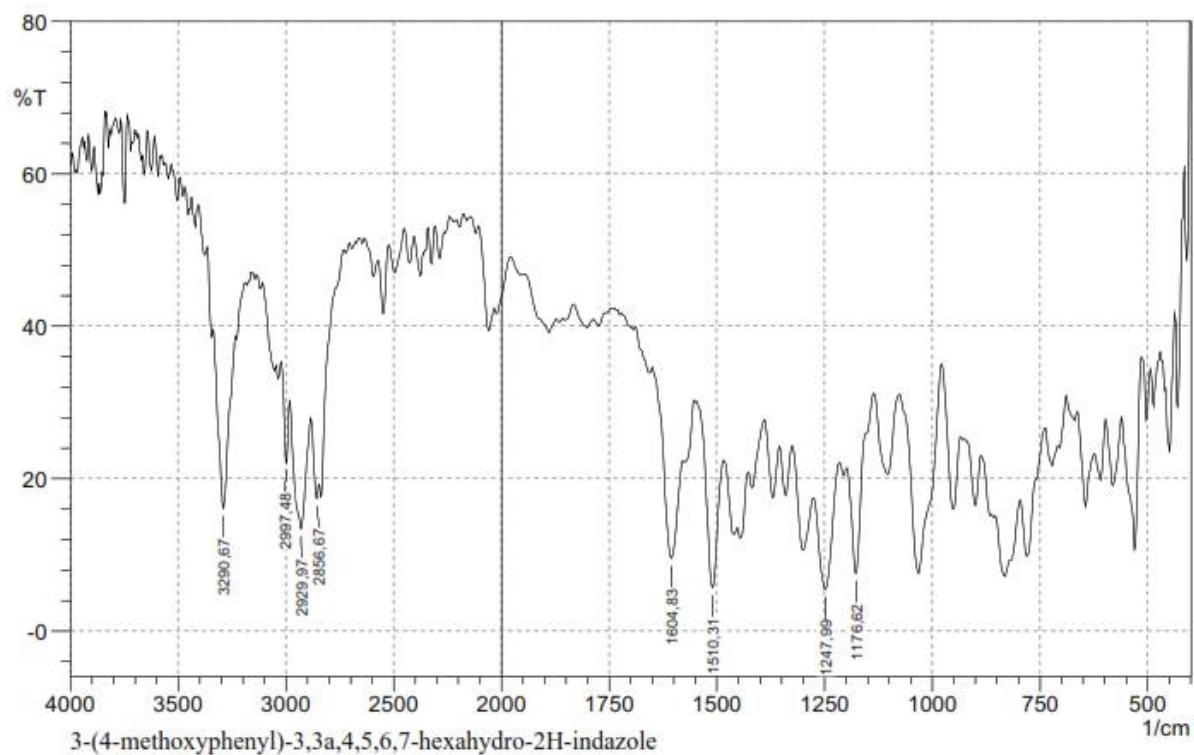

Figure S1: FTIR of 3-(4-methoxyphenyl)-3,3a,4,5,6,7-hexahydro-2H-indazole (1)

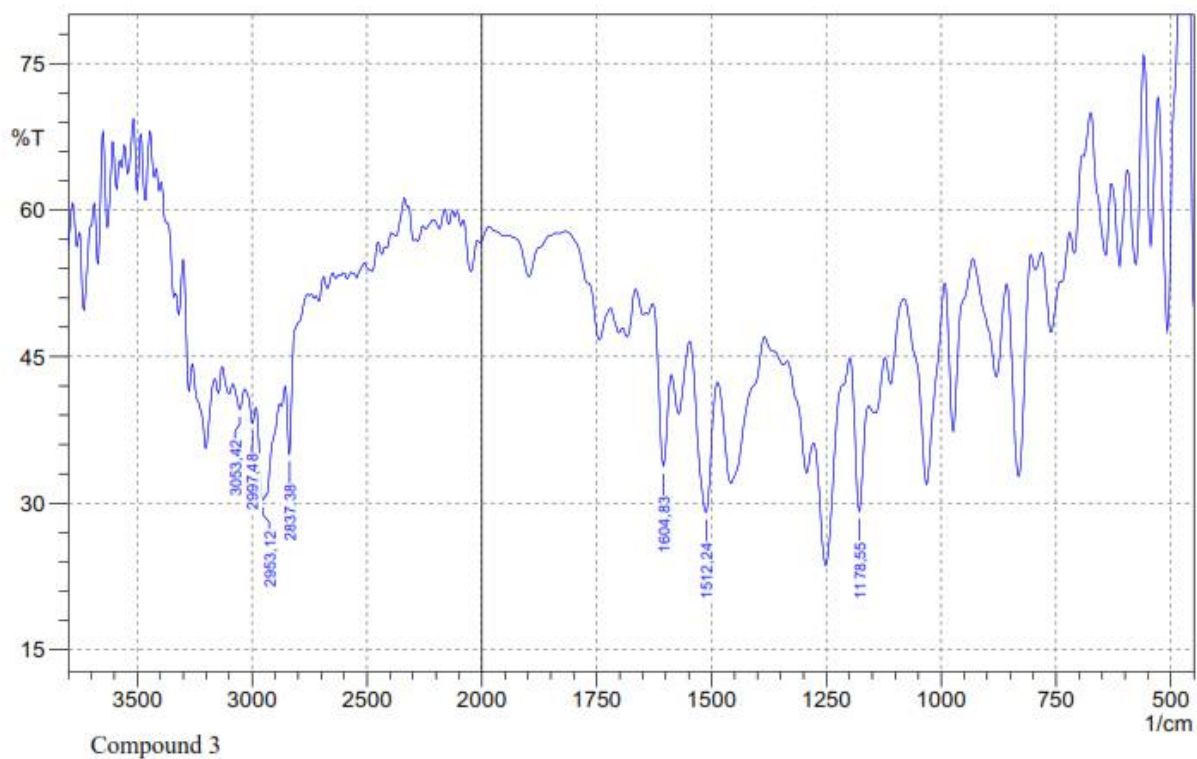

Figure S2: FT-IR spectrum of compound 3

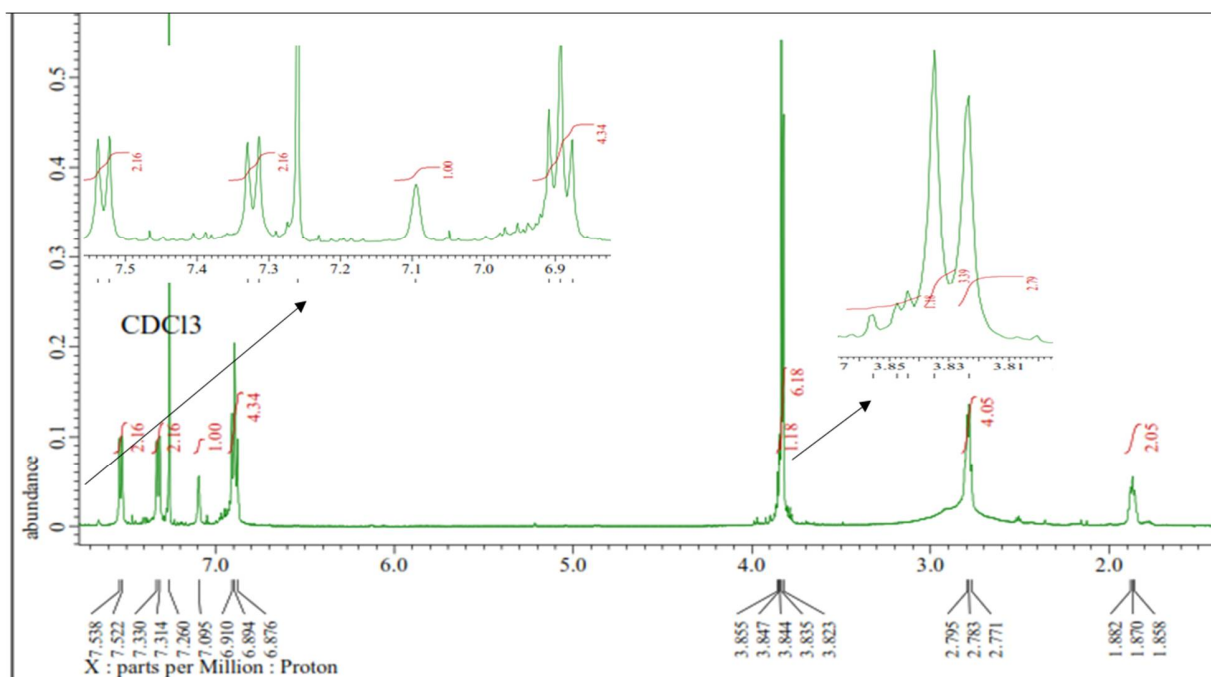

Figure S3: <sup>1</sup>H-NMR spectrum of compound **3**

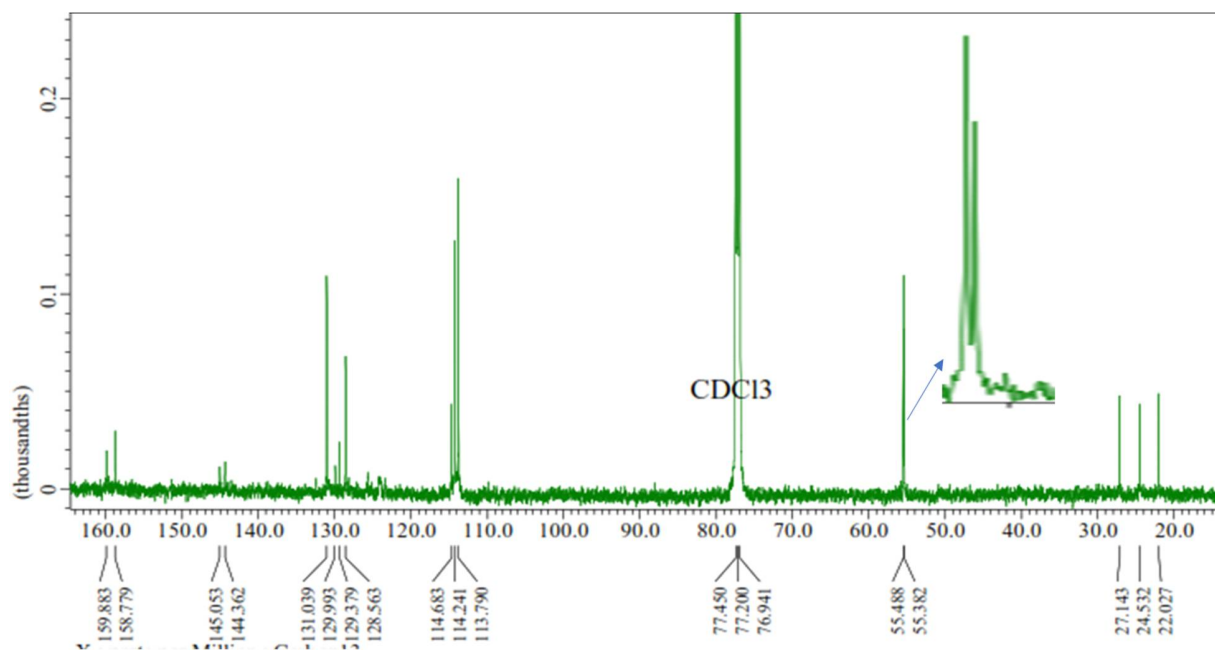

Figure S4: <sup>13</sup>C-NMR spectrum of compound **3**

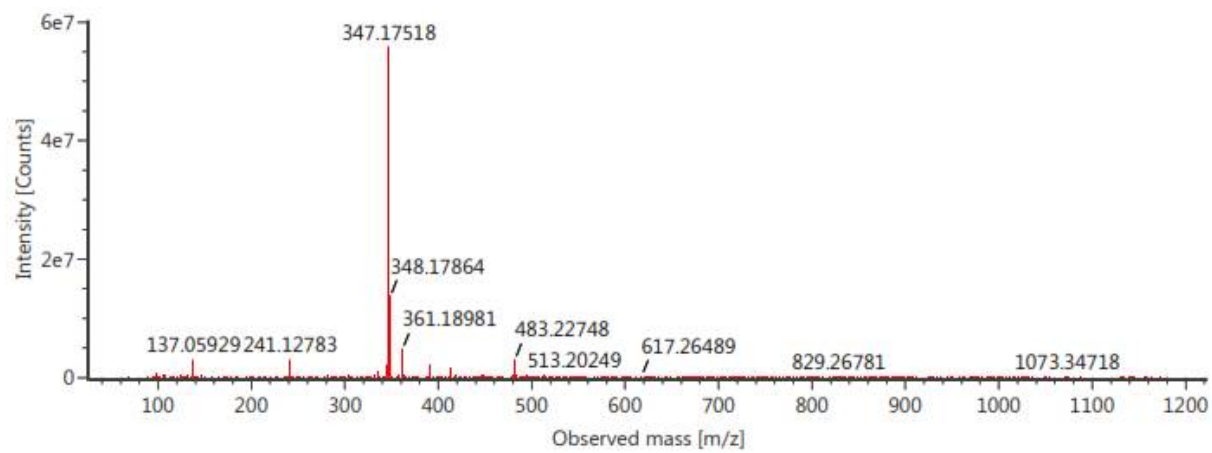

Figure S5: HR-MS of the title compound **3**
